# Supplementary material for: Field-induced slow relaxation of magnetization in the S = 3/2 octahedral complexes trans-[Co{(OPPh2)(EPPh2)N}2(dmf)2], E = S, Se: effects of Co–Se vs. Co–S coordination
Source: Royal Society of Chemistry journal article supplement (doi:10.1039/c9qi00135b), 2019-01-01
Supplement: c9qi00135b1.pdf [file c9qi00135b1.pdf]

## SUPPLEMENTARY INFORMATION

### Field-induced slow relaxation of magnetization in the $S = 3/2$ octahedral complexes *trans*-[Co{(OPPh<sub>2</sub>)(EPh<sub>2</sub>)N}<sub>2</sub>(dmf)<sub>2</sub>], E = S, Se: Effects of Co–Se vs Co–S coordination<sup>†</sup>

Eleftherios Ferentinos,<sup>a§</sup> Meixing Xu,<sup>b§</sup> Alexios Grigoropoulos,<sup>a#</sup> Ioannis Bratsos,<sup>d</sup>  
Catherine P. Raptopoulou,<sup>d</sup> Vassilis Psycharis,<sup>d</sup> Shang-Da Jiang,<sup>b,c\*</sup> Panayotis Kyritsis<sup>a\*</sup>

---

<sup>a</sup>Inorganic Chemistry Laboratory, Department of Chemistry, National and Kapodistrian University of Athens, Panepistimiopolis, GR-15771 Athens, Greece. email: kyritsis@chem.uoa.gr

<sup>b</sup>College of Chemistry and Molecular Engineering, Beijing National Laboratory for Molecular Sciences, Beijing Key Laboratory of Magnetolectric Materials and Devices, Peking University, Beijing 100871, P. R. China. email: jiangsd@pku.edu.cn

<sup>c</sup>Beijing Academy of Quantum Information Sciences, West Bld.#3, No.10 Xibeiwang East Rd., Haidian District, Beijing 100193, P. R. China

<sup>d</sup>NCSR "Demokritos", Institute of Nanoscience and Nanotechnology, 15310 Aghia Paraskevi, Athens, Greece

<sup>#</sup>Present address: Department of Chemistry, Materials Innovation Factory, University of Liverpool, Liverpool L7 3NY, U.K.

<sup>§</sup>These authors contributed equally.

## IR spectroscopy

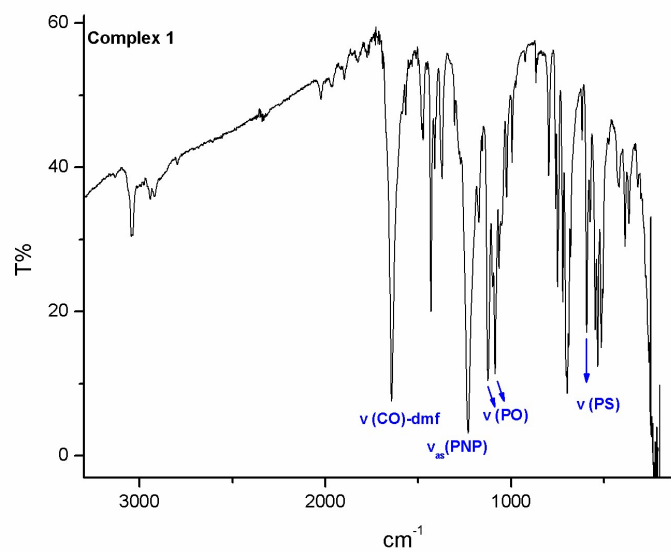

**Figure S1.** IR spectrum of complex 1 (KBr pellet).

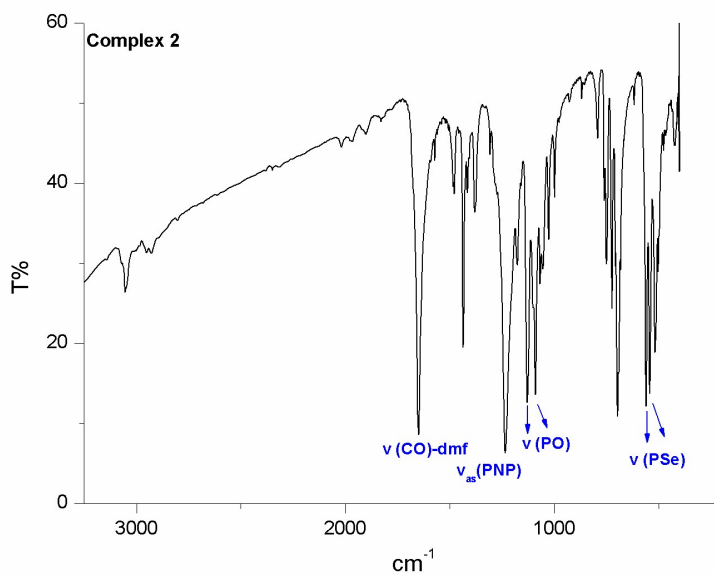

**Figure S2.** IR spectrum of complex 2 (KBr pellet).

**IR spectroscopic characterization of complexes 1 and 2.** The IR spectra of complexes **1** and **2** are shown in Figures S1 and S2, respectively. The strong bands observed for complexes **1** and **2** at 1232 cm<sup>-1</sup> and 1086-1129 cm<sup>-1</sup> are assigned to the  $\nu_{as}(\text{P-N-P})$  and  $\nu(\text{P-O})$  stretching vibrations, respectively, while the intense bands at 593 cm<sup>-1</sup> for complex **1** and 560, 542 cm<sup>-1</sup> for complex **2** correspond to the  $\nu(\text{P-S})$  and  $\nu(\text{P-Se})$  vibrations, respectively. The (OPPh<sub>2</sub>)(SPPPh<sub>2</sub>)NH ligand exhibits a  $\nu_{as}(\text{P-N-P})$  band at 934 cm<sup>-1</sup>,  $\nu(\text{P-O})$  bands at 1202 and 1187 cm<sup>-1</sup> and a  $\nu(\text{P-S})$  band at 626 and 613 cm<sup>-1</sup>.<sup>1</sup> In the case of the (OPPh<sub>2</sub>)(SePPh<sub>2</sub>)NH ligand, strong bands appear at 938, 1182-1200 and 541 cm<sup>-1</sup> which have been assigned to  $\nu_{as}(\text{P-N-P})$ ,  $\nu(\text{P-O})$  and  $\nu(\text{P-Se})$  vibrations, respectively.<sup>1</sup> This behavior confirms the increase in the P–N bond order and the decrease in the P–O and P–S bonds order upon deprotonation and coordination of the ligand to Co(II), due to the delocalization of  $\pi$ -electronic density.<sup>2,3</sup> On the other hand, complex **2** shows two  $\nu(\text{P-Se})$  bands, one of the same frequency with the free (OPPh<sub>2</sub>)(SePPh<sub>2</sub>)NH ligand (542 cm<sup>-1</sup>) and one shifted to higher energy by 19 cm<sup>-1</sup>. It should be noted that this unexpected response (*i.e.* splitting and higher frequency shifting) of the  $\nu(\text{P-Se})$  vibration bands has also been observed for K[(OPPh<sub>2</sub>)(SePPh<sub>2</sub>)N] (561 cm<sup>-1</sup>), as well as for the *cis*-[Pd{(OPPh<sub>2</sub>)(SePPh<sub>2</sub>)N}<sub>2</sub>] complex (566 and 554 cm<sup>-1</sup>). Complexes **1** and **2** also exhibit an intense band at 1644 and 1648 cm<sup>-1</sup>, respectively, which is assigned to the  $\nu(\text{C-O})$  stretch of coordinated DMF. The  $\nu(\text{C-O})$  band is shifted to lower energy by  $\sim 30$  cm<sup>-1</sup>, compared to free dmf (1675 cm<sup>-1</sup>), consistent with coordination of DMF to Co(II), as verified by X-ray crystallography. Similar IR bands (1643 cm<sup>-1</sup>) have also been observed for *trans*-[Ni{(OPPh<sub>2</sub>)(EPPPh<sub>2</sub>)N}<sub>2</sub>(dmf)<sub>2</sub>], E = (O, S, Se), complexes.<sup>4</sup>

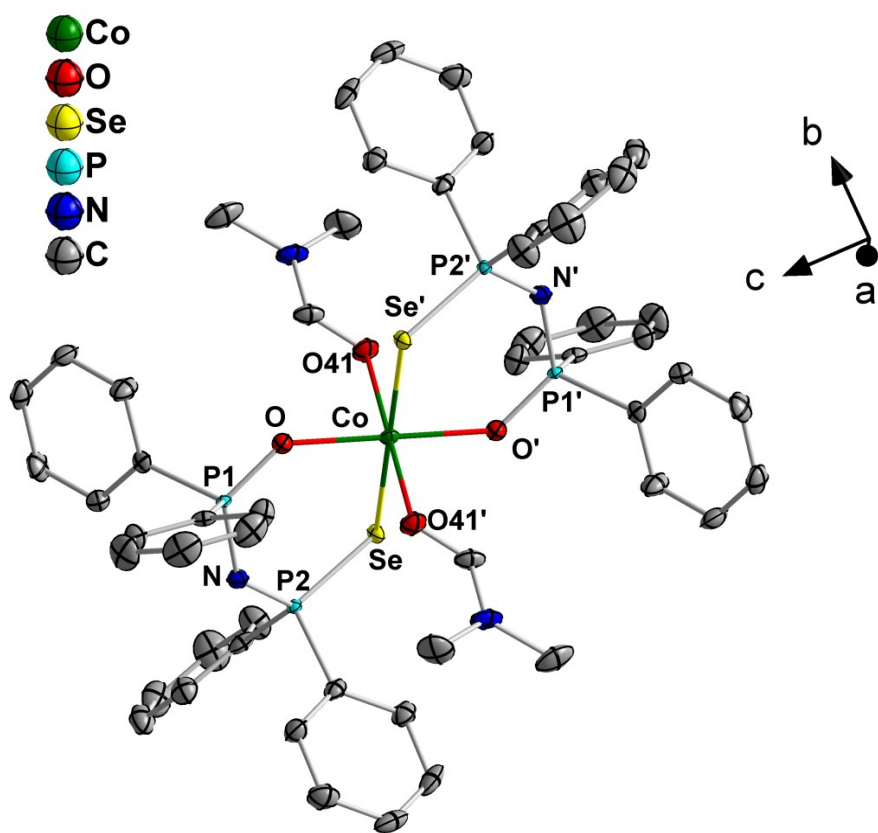

**Figure S3.** Ortep plot of complex 2. Thermal ellipsoids are presented at a 50% probability level.

## PXRD patterns of complexes 1 and 2.

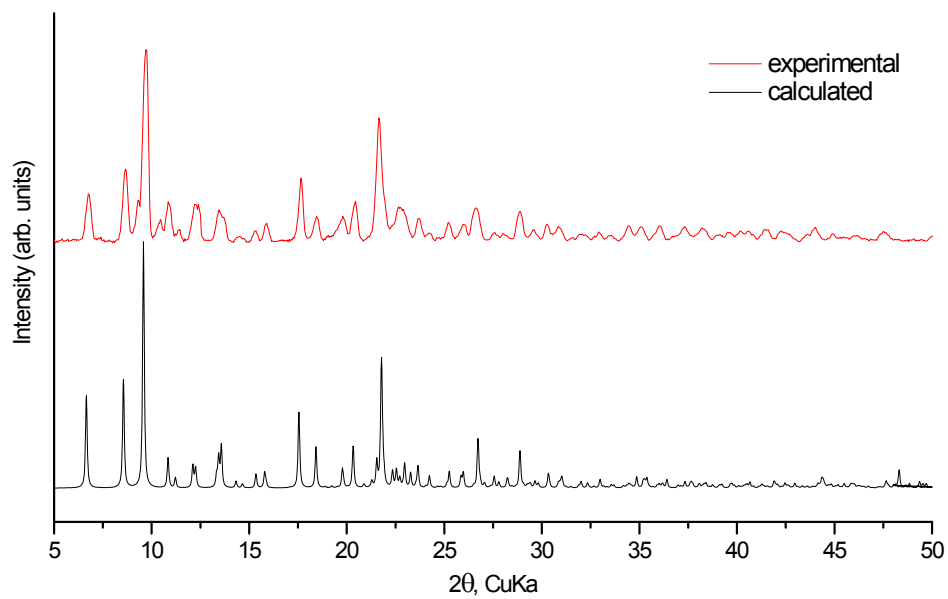

**Figure S4.** PXRD pattern of complex 1.

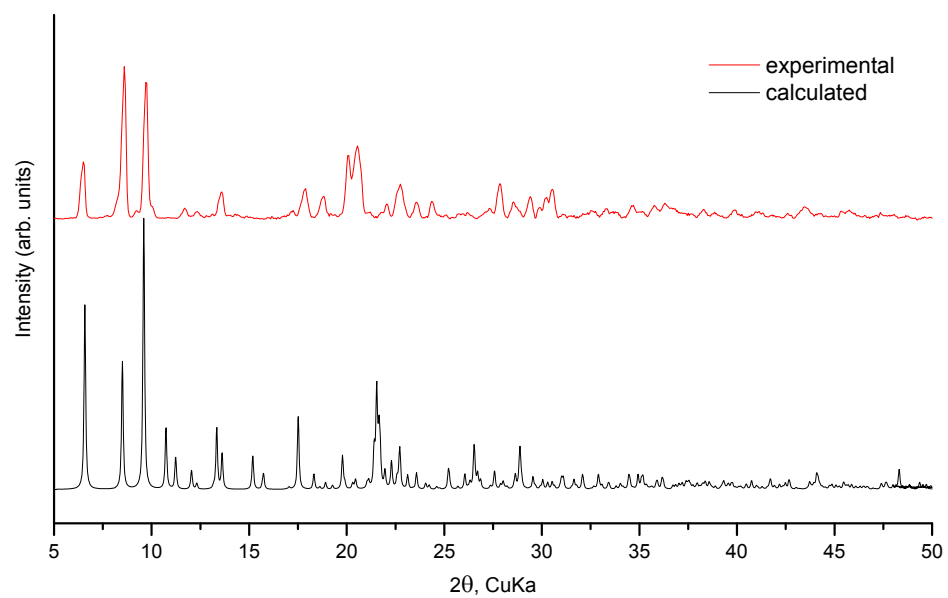

**Figure S5.** PXRD pattern of complex 2.

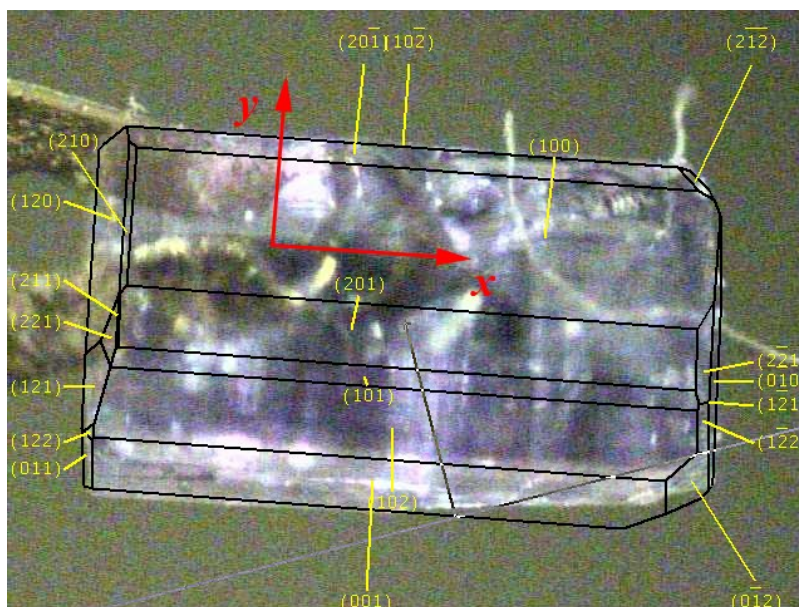

**Figure S6.** Orientation of a crystal of complex **1**. The XYZ coordinates are defined as follows: The intersecting line between face (100) and (001) as X axis, the normal direction of face (100) as Z axis and the Y axis is defined according to the right hand rule.

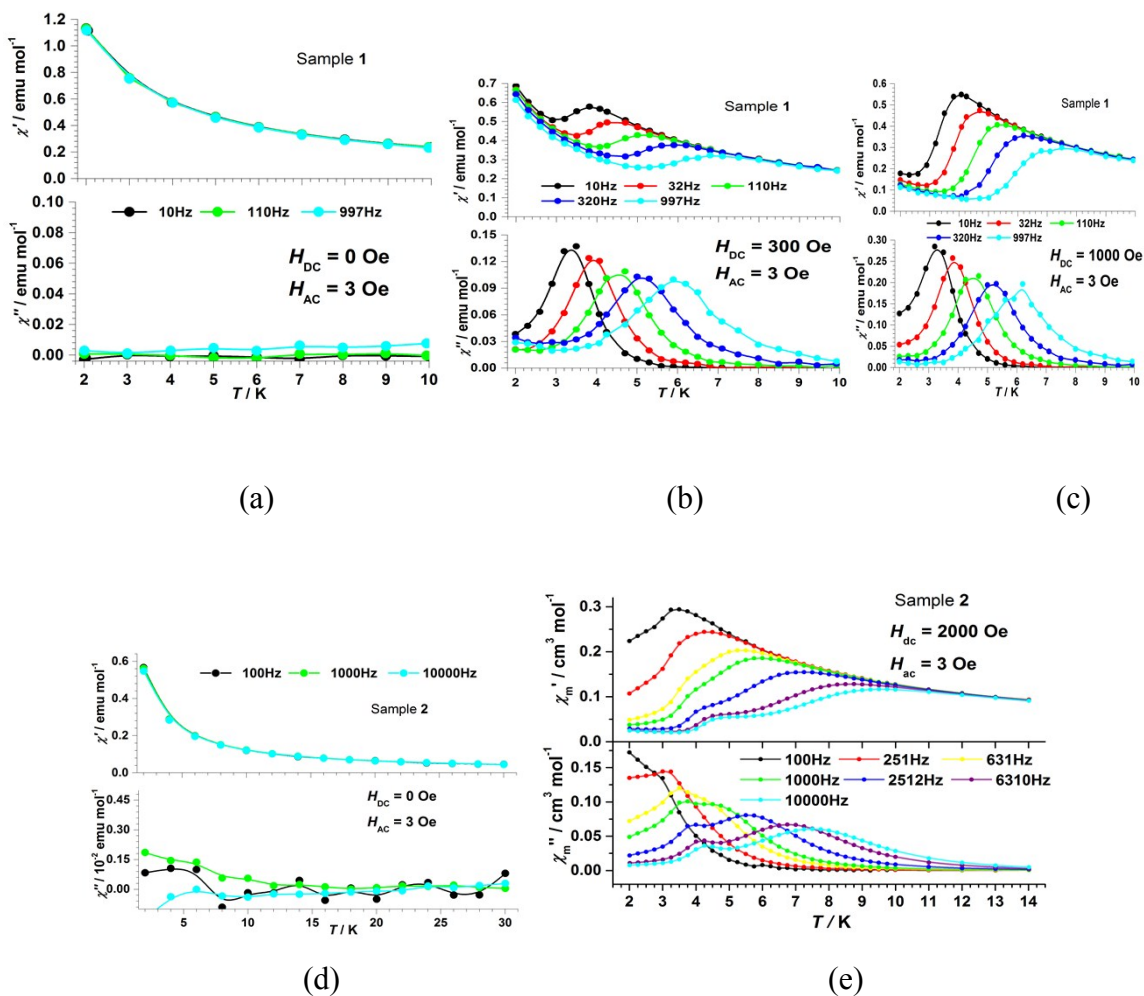

**Figure S7.** Temperature dependence of the in-phase (upper) and out-of-phase (below) AC susceptibility under 0 Oe (a), 300 Oe (b) and 1000 Oe (c) for complex 1 between 10 and 1000 Hz. The analogous data for complex 2 under 0 Oe (d) and 2000 Oe (e), between 100 and 10000 Hz.

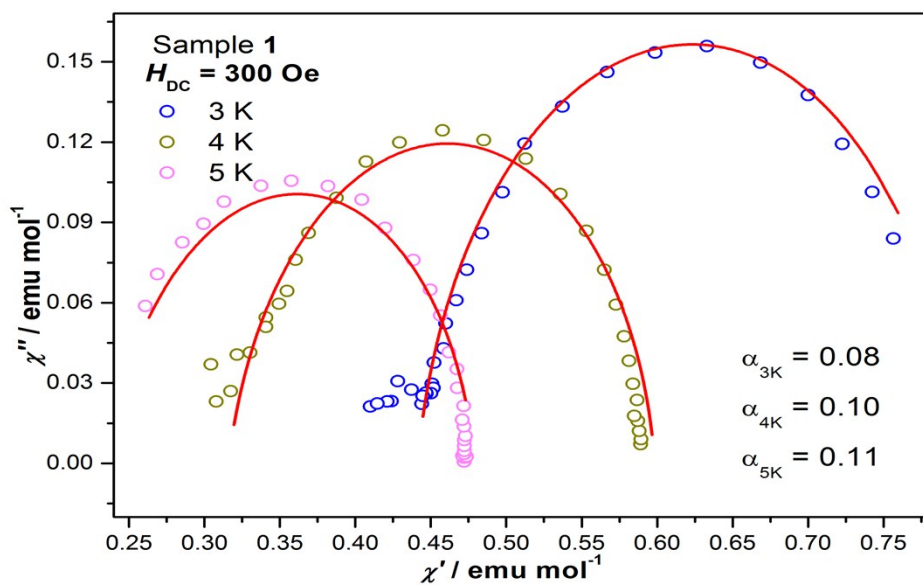

(a)

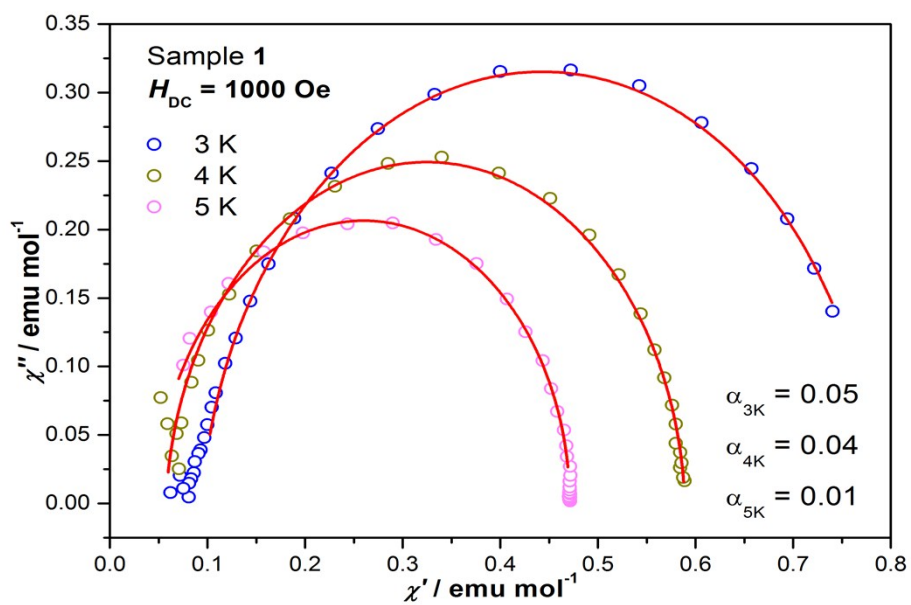

(b)

**Figure S8.** Cole-Cole plots for complex **1** under 300 Oe (a) and 1000 Oe (b) from 3 to 5 K. Red solid lines represent the fitting results using a generalized Debye model.



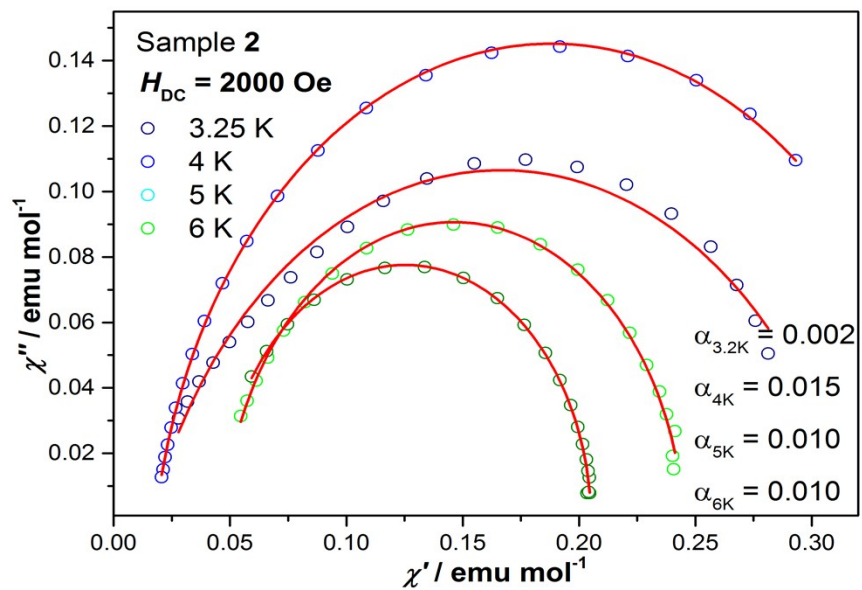

**Figure S9.** Cole-Cole plots for complex **2** under 2000 Oe from 3.25 to 6 K. Red solid lines represent the fitting results using a generalized Debye model..

**Table S1.** Octahedral  $S = 3/2$  Co(II) complexes showing field-induced slow relaxation of magnetization.

| Complex                                                                                                                                                                                                                                           | Coordination sphere              | $U_{\text{eff}}$ (cm <sup>-1</sup> ) | $D$ or $\Delta_{\text{ax}}$ (cm <sup>-1</sup> ) | $E$ or $\Delta_{\text{rh}}$ (cm <sup>-1</sup> ) |
|---------------------------------------------------------------------------------------------------------------------------------------------------------------------------------------------------------------------------------------------------|----------------------------------|--------------------------------------|-------------------------------------------------|-------------------------------------------------|
| Complex 1 (this work)                                                                                                                                                                                                                             | CoO <sub>4</sub> S <sub>2</sub>  | 23.6                                 | $\Delta_{\text{ax}} = -487.4$                   | $\Delta_{\text{rh}} = 0.15$                     |
| Complex 2 (this work)                                                                                                                                                                                                                             | CoO <sub>4</sub> Se <sub>2</sub> | 18.1                                 | $\Delta_{\text{ax}} = -448.4$                   | $\Delta_{\text{rh}} = -0.43$                    |
| [Co(dmphen) <sub>2</sub> (NCS) <sub>2</sub> ] <sup>5</sup><br>dmphen = 2,9-dimethyl-1,10-phenanthroline                                                                                                                                           | CoN <sub>6</sub>                 | 17.0                                 | $D = 98$<br>$\Delta_{\text{ax}} = 493$          | $E = 8.4$<br>$\Delta_{\text{rh}} = 22.5$        |
| (HNEt <sub>3</sub> )[Co <sup>II</sup> Co <sup>III</sup> L <sub>6</sub> ] <sup>6</sup><br>H <sub>2</sub> L = R-4-bromo-2-((2-hydroxy-1-phenylethylimino)methyl)phenol                                                                              | CoO <sub>6</sub>                 | 76                                   | $D = -115$                                      | $E = 2.8$                                       |
| [Co(μ-L')(μ-OAc)Y(NO <sub>3</sub> ) <sub>2</sub> ] <sup>7</sup><br>H <sub>2</sub> L' = N,N',N''-trimethyl-N,N''-bis(2-hydroxy-3-methoxy-5-methylbenzyl)-diethylenetriamine                                                                        | CoO <sub>3</sub> N <sub>3</sub>  | 15.7                                 | $D = 47$<br>$\Delta_{\text{ax}} = 645.5$        | $\Delta_{\text{rh}} = -55.8$                    |
| [Co <sup>II</sup> Co <sup>III</sup> (L''H <sub>2</sub> ) <sub>2</sub> Cl(H <sub>2</sub> O)](H <sub>2</sub> O) <sub>3</sub> <sup>8</sup><br>L''H <sub>4</sub> = 2-[[[(2-hydroxy-3-methoxyphenyl)methylene]amino]-2-(hydroxymethyl)-1,3-propanediol | CoO <sub>5</sub> Cl              | 7.9                                  | $D = -7.4$<br>$\Delta_{\text{ax}} = 339$        |                                                 |
| [Co <sup>II</sup> Co <sup>III</sup> (L''H <sub>2</sub> ) <sub>2</sub> Br(H <sub>2</sub> O)](H <sub>2</sub> O) <sub>3</sub> <sup>8</sup><br>L''H <sub>4</sub> = 2-[[[(2-hydroxy-3-methoxyphenyl)methylene]amino]-2-(hydroxymethyl)-1,3-propanediol | CoO <sub>5</sub> Br              | 14.5                                 | $D = -9.7$<br>$\Delta_{\text{ax}} = 231$        |                                                 |
| [Co(abpt) <sub>2</sub> (tcm) <sub>2</sub> ] <sup>9</sup><br>abpt = 4-amino-3,5-bis(2-pyridyl)-1,2,4-triazole<br>tcm = tricyanomethanide anion                                                                                                     | CoN <sub>6</sub>                 | 60.3                                 | $D = 48$                                        | $E = 13$                                        |
| [Co(acac) <sub>2</sub> (H <sub>2</sub> O) <sub>2</sub> ] <sup>10</sup><br>acac = acetylacetonate                                                                                                                                                  | CoO <sub>6</sub>                 | 14-17                                | $D = 57$                                        | $E = 17$                                        |
| [(TBA) <sub>9</sub> HCo(SiW <sub>9</sub> O <sub>31</sub> )(SiO <sub>9</sub> O <sub>32</sub> )] <sup>2+11</sup><br>TBA = tetra-n-butylammonium                                                                                                     | CoO <sub>6</sub>                 | 13.5                                 | $D = 95.2$                                      | $E = 7.2$                                       |
| [Co(dca) <sub>2</sub> (atz) <sub>2</sub> ] <sub>n</sub> <sup>12</sup>                                                                                                                                                                             | CoN <sub>6</sub>                 | 5.1                                  | $\Delta_{\text{ax}} = -509$                     |                                                 |

|                                                                                                                                |                                 |               |                                             |            |
|--------------------------------------------------------------------------------------------------------------------------------|---------------------------------|---------------|---------------------------------------------|------------|
| dca = dicyanamide<br>atz = 2-amino-1,3,5-triazine                                                                              |                                 |               |                                             |            |
| $[\text{Co}(\text{oda})(\text{aterpy})]^{13}$<br>oda <sup>2-</sup> = oxodiacetate<br>aterpy = 4'-azido-2,2':6',2''-terpyridine | CoO <sub>3</sub> N <sub>3</sub> | 2.9           | $D = -7.44$                                 |            |
| $[\text{Co}(\text{btm})_2(\text{SCN})_2]_n^{14}$<br>btm = bis(1H-1,2,4-triazol-1-yl)methane                                    | CoN <sub>6</sub>                | 31.6          | $D = 56.6$                                  | $E = 3.7$  |
| $[\text{Co}(\text{ppad})_2]_n^{15}$<br>ppad = N <sup>3</sup> -(3-pyridoyl)-3-pyridinecarboxamidrazone                          | CoO <sub>4</sub> N <sub>2</sub> | 11.4          | $D = 76$<br>$\Delta_{\text{ax}} = -482$     | $E = +6.5$ |
| $[\text{Co}(\text{bpm})_2(\text{N}_3)_2]^{16}$<br>bpm = bis(pyrazol-1-yl)methane                                               | CoN <sub>6</sub>                | 23.1          |                                             |            |
| $[\text{Co}(\text{bpm})_2(\text{H}_2\text{O})_2]^{2+16}$<br>bpm = bis(pyrazol-1-yl)methane                                     | CoN <sub>4</sub> O <sub>2</sub> | 23.1          |                                             |            |
| $[\text{Co}(\text{9Accm})_2(\text{py})_2]^{17}$<br>9Accm = curcuminoid ligand                                                  | CoO <sub>4</sub> N <sub>2</sub> |               | $D = 74$                                    | $E = 1.2$  |
| $[\text{Co}(\text{9Accm})_2(\text{bpy})]^{17}$<br>9Accm = curcuminoid ligand                                                   | CoO <sub>4</sub> N <sub>2</sub> |               | $D = 24$                                    | $E = -1.9$ |
| $[\text{Co}(\text{AcO})_2(\text{py})_2(\text{H}_2\text{O})_2]^{18}$<br>py = pyridine                                           | CoO <sub>4</sub> N <sub>2</sub> | 25.0          |                                             |            |
| $[\text{Co}(\text{dca})_2(\text{bim})_4]^{19}$<br>dca = dicyanamide<br>bim = 1-benzylimidazole                                 | CoN <sub>6</sub>                | 5.5-<br>7.7   | $D =  69.6 $<br>$\Delta_{\text{ax}} = -416$ |            |
| $[\text{Co}(\text{dca})_2(\text{bim})_2]_n^{19}$<br>dca = dicyanamide<br>bim = 1-benzylimidazole                               | CoN <sub>6</sub>                | 4.5-<br>9.2   | $D =  74.3 $<br>$\Delta_{\text{ax}} = -403$ |            |
| $[\text{Co}(\text{dca})_2(\text{bmim})_2]_n^{19}$<br>dca = dicyanamide<br>bmim = 1-benzyl-2-methylimidazole                    | CoN <sub>6</sub>                | 11.5-<br>15.4 | $D =  75.8 $<br>$\Delta_{\text{ax}} = -606$ |            |

|                                                                                                                                                                                                                                                                     |                                       |      |                                            |                      |
|---------------------------------------------------------------------------------------------------------------------------------------------------------------------------------------------------------------------------------------------------------------------|---------------------------------------|------|--------------------------------------------|----------------------|
| [Co(bpy) <sub>2</sub> (ClAn)] <sup>20</sup><br>bpy = 2,2'-bipyridine<br>ClAn <sup>2-</sup> = chloranilate                                                                                                                                                           | CoN <sub>4</sub> O <sub>2</sub>       | 16.6 | $D = 64.5$                                 | $E = 10.1$           |
| [Co(SDZ) <sub>2</sub> bpy] <sup>21</sup><br>SDZ = sulfadiazine<br>bpy = 2,2'-bipyridine                                                                                                                                                                             | CoN <sub>6</sub>                      | 35.2 | $D =  81.1 $                               | $E = 2$              |
| [Co(SDZ) <sub>2</sub> (6MQ) <sub>2</sub> ] <sup>21</sup><br>SDZ = sulfadiazine<br>6MQ = 6-methoxyquinoline                                                                                                                                                          | CoN <sub>6</sub>                      | 7.0  | $D =  78.9 $                               |                      |
| [Co(3,5-dnb) <sub>2</sub> (py) <sub>2</sub> (H <sub>2</sub> O) <sub>2</sub> ] <sup>22</sup><br>3,5-Hdnb = 3,5-dinitrobenzoic acid<br>py = pyridine                                                                                                                  | CoO <sub>4</sub> N <sub>2</sub>       | ~ 20 | $\Delta_{ax} = 644$<br>$\Delta_{ax} = 423$ |                      |
| Et <sub>4</sub> N[Co(hfac) <sub>3</sub> ] <sup>23</sup><br>hfac = hexafluoroacetylacetonate                                                                                                                                                                         | CoO <sub>6</sub>                      | 13.6 | $D = 117.8$<br>$\Delta_{ax} = 428.3$       | $\Delta_{rh} = 90.3$ |
| {[Co(3,3'-Hbpt) <sub>2</sub> (SCN) <sub>2</sub> ].2H <sub>2</sub> O} <sub>n</sub> <sup>24</sup><br>3,3'-Hbpt = 1H-3-(3-pyridyl)-5-(3'-pyridyl)-1,2,4-triazole                                                                                                       | CoN <sub>6</sub>                      | 22.6 | $D = 70.1$                                 | $E = 0.7$            |
| [Co(T <sub>p</sub> <sup>*</sup> ) <sub>2</sub> ] <sup>25</sup><br>KT <sub>p</sub> <sup>*</sup> = Potassium hydridotris(3,5-dimethylpyrazole)borate                                                                                                                  | CoN <sub>6</sub>                      | 26.8 |                                            |                      |
| [Co <sup>II</sup> Co <sup>III</sup> (LH <sub>2</sub> ) <sub>2</sub> (CH <sub>3</sub> COO)(H <sub>2</sub> O)](H <sub>2</sub> O) <sub>3</sub> <sup>26</sup><br>LH <sub>4</sub> = 2-[[2-(2-hydroxy-3-methoxyphenyl)-methylene]amino]-2-(hydroxymethyl)-1,3-propanediol | CoO <sub>6</sub>                      | 16.9 | $\Delta_{ax} = -711$                       | $\Delta_{rh} = 44$   |
| [Co(dppm <sup>0,0</sup> ) <sub>3</sub> ][CoBr <sub>4</sub> ] <sup>27</sup><br>dppm = bis(diphenylphosphano) methane                                                                                                                                                 | CoO <sub>6</sub><br>CoBr <sub>4</sub> |      | $D = 147$                                  |                      |
| [Co(dppm <sup>0,0</sup> ) <sub>3</sub> ][CoCl <sub>4</sub> ] <sup>28</sup><br>dppm <sup>0,0</sup> = bis-(diphenylphosphan)methane                                                                                                                                   | CoO <sub>6</sub><br>CoCl <sub>4</sub> | 106  | $D = 77$                                   |                      |
| [Co(dppm <sup>0,0</sup> ) <sub>3</sub> ][CoBr <sub>4</sub> ] <sup>28</sup>                                                                                                                                                                                          | CoO <sub>6</sub>                      |      | $D = 122$                                  |                      |

|                                                                                                                                     |                                      |       |                        |                       |
|-------------------------------------------------------------------------------------------------------------------------------------|--------------------------------------|-------|------------------------|-----------------------|
| dppm <sup>0,0</sup> = bis-(diphenylphosphan)methane                                                                                 | CoBr <sub>4</sub>                    |       |                        |                       |
| [Co(dppm <sup>0,0</sup> ) <sub>3</sub> ][CoI <sub>4</sub> ] <sup>28</sup><br>dppm <sup>0,0</sup> = bis-(diphenylphosphan)methane    | CoO <sub>6</sub><br>CoI <sub>4</sub> | 47.9  | <i>D</i> = 99          |                       |
| [Co(hfac) <sub>2</sub> (H <sub>2</sub> O) <sub>2</sub> ] <sup>29</sup><br>hfac = hexafluoroacetylacetonate                          | CoO <sub>6</sub>                     | 8.1   | $\Delta_{ax} = -499.7$ | $\Delta_{rh} = 136.3$ |
| [Co(pydm) <sub>2</sub> ](dnbz) <sub>2</sub> ] <sup>30</sup><br>pydm = 2,6 – pyridinedimethanol<br>dnbz = dinitrobenzoato            | CoO <sub>4</sub> N <sub>2</sub>      | 27.3  | <i>D</i> = 44          |                       |
| [Co(bzpy) <sub>4</sub> Cl <sub>2</sub> ] <sup>31</sup><br>bzpy = 4-benzylpyridine                                                   | CoN <sub>4</sub> Cl <sub>2</sub>     |       | <i>D</i> = 106         |                       |
| [Co(bzpy) <sub>4</sub> (NCS) <sub>2</sub> ] <sup>30</sup><br>bzpy = 4-benzylpyridine                                                | CoN <sub>6</sub>                     |       | <i>D</i> = 90.5        |                       |
| [Co(L <sup>1</sup> ) <sub>2</sub> ] <sup>2+32</sup><br>L <sup>1</sup> = pyridine-2,6-bis(oxazoline) (pybox type)                    | CoN <sub>6</sub>                     | 10.35 | <i>D</i> = 61.1        | <i>E</i> = -5.5       |
| [Co(L <sup>2</sup> ) <sub>2</sub> ] <sup>2+32</sup><br>L <sup>2</sup> = pyridine-2,6-bis(oxazoline) (pybox type)                    | CoN <sub>6</sub>                     | 19.1  | <i>D</i> = 68.1        | <i>E</i> = -5.7       |
| [Co(L <sup>3</sup> ) <sub>2</sub> ] <sup>2+32</sup><br>L <sup>3</sup> = pyridine-2,6-bis(oxazoline) (pybox type)                    | CoN <sub>6</sub>                     | 15.8  | <i>D</i> = 56.4        | <i>E</i> = -10.5      |
| [Co(L <sup>4</sup> ) <sub>2</sub> ] <sup>2+32</sup><br>L <sup>4</sup> = pyridine-2,6-bis(oxazoline) (pybox type)                    | CoN <sub>6</sub>                     | 21.5  | <i>D</i> = -66.4       | <i>E</i> = 10.2       |
| [Co(L <sup>5</sup> ) <sub>2</sub> ] <sup>2+32</sup><br>L <sup>5</sup> = pyridine-2,6-bis(oxazoline) (pybox type)                    | CoN <sub>6</sub>                     | 14.3  | <i>D</i> = 62.9        | <i>E</i> = -2.4       |
| [Co(L <sup>6</sup> ) <sub>2</sub> ] <sup>2+32</sup><br>L <sup>6</sup> = pyridine-2,6-bis(oxazoline) (pybox type)                    | CoN <sub>6</sub>                     | 5.6   | <i>D</i> = 74.9        | <i>E</i> = -2.7       |
| [Co(hfa) <sub>2</sub> (pic) <sub>2</sub> ] <sup>33</sup><br>hfa = 1,1,1,5,5,5-hexafluoro-2,4-pentanedione<br>pic = 4-methylpyridine | CoO <sub>4</sub> N <sub>2</sub>      | 24.7  | <i>D</i> = 24.17       | <i>E</i> = 6.9        |
| [Co(dcnm)(H <sub>2</sub> O)(phen) <sub>2</sub> ](dcnm) <sup>34</sup>                                                                | CoN <sub>4</sub> O <sub>2</sub>      | 1.4   | <i>D</i> = 79          | <i>E</i> = 0.83       |

|                                                                                                                                                                                     |                                 |      |                                             |                                            |
|-------------------------------------------------------------------------------------------------------------------------------------------------------------------------------------|---------------------------------|------|---------------------------------------------|--------------------------------------------|
| dcnm = dicyanonitrosomethanide                                                                                                                                                      |                                 |      |                                             |                                            |
| [Co(H <sub>2</sub> pimdc) <sub>2</sub> (phen)] <sub>n</sub> <sup>35</sup><br>H <sub>2</sub> pimdc = 2-propyl-imidazole-4,5-dicarboxylate                                            | CoN <sub>4</sub> O <sub>2</sub> | 23.1 | <i>D</i> = 3.5                              | <i>E</i> = 1.0                             |
| [Co(abpt) <sub>2</sub> (H <sub>2</sub> O) <sub>2</sub> ](N[C(CN) <sub>2</sub> ] <sub>2</sub> ) <sub>2</sub> <sup>36</sup><br>abpt = 4-amino-3,5-bis(2-pyridyl)-1,2,4-triazole       | CoN <sub>4</sub> O <sub>2</sub> | 66.4 | <i>D</i> = 34.9                             |                                            |
| [Co(abpt) <sub>2</sub> (H <sub>2</sub> O) <sub>2</sub> ](NO <sub>2</sub> C(CN) <sub>2</sub> ) <sub>2</sub> <sup>36</sup><br>abpt = 4-amino-3,5-bis(2-pyridyl)-1,2,4-triazole        | CoN <sub>4</sub> O <sub>2</sub> | 72.2 | <i>D</i> = 31.0                             |                                            |
| [Co(abpt) <sub>2</sub> (CH <sub>3</sub> OH) <sub>2</sub> ](C(CN)[C(CN) <sub>2</sub> ] <sub>2</sub> ) <sub>2</sub> <sup>36</sup><br>abpt = 4-amino-3,5-bis(2-pyridyl)-1,2,4-triazole | CoN <sub>4</sub> O <sub>2</sub> | 13.1 | <i>D</i> = 37.8                             |                                            |
| [Co(abpt) <sub>2</sub> (NO <sub>2</sub> NCN) <sub>2</sub> ] <sup>36</sup><br>abpt = 4-amino-3,5-bis(2-pyridyl)-1,2,4-triazole                                                       | CoN <sub>6</sub>                | 44.5 | <i>D</i> = 41.4                             |                                            |
| [Co(abpt) <sub>2</sub> (NCSe) <sub>2</sub> ] <sup>36</sup><br>abpt = 4-amino-3,5-bis(2-pyridyl)-1,2,4-triazole                                                                      | CoN <sub>6</sub>                | 51.4 | <i>D</i> = 37.7                             |                                            |
| [Co(abpt) <sub>2</sub> [ONC(CN) <sub>2</sub> ] <sub>2</sub> ] <sup>36</sup><br>abpt = 4-amino-3,5-bis(2-pyridyl)-1,2,4-triazole                                                     | CoN <sub>4</sub> O <sub>2</sub> | 47.3 | Δ <sub>ax</sub> = -1345                     |                                            |
| [Co(bppCOOH) <sub>2</sub> ](ClO <sub>4</sub> ) <sub>2</sub> <sup>37</sup><br>bpp-COOMe = methyl 2,6-di(pyrazol-1-yl)pyridine-4-carboxylate                                          | CoN <sub>6</sub>                | 11   | <i>D</i> = 51.6                             |                                            |
| [Co(pyrtpy) <sub>2</sub> ](BPh <sub>4</sub> ) <sub>2</sub> <sup>38</sup><br>pyrtpy = 4'-pyrrolidine-2,2':6',2''-terpyridine                                                         | CoN <sub>6</sub>                | 6.8  | <i>D</i> = -53.6                            | <i>E</i> = 5.53                            |
| [Co(bpp-COOMe) <sub>2</sub> ](ClO <sub>4</sub> ) <sub>2</sub> <sup>39</sup><br>bpp-COOMe = methyl 2,6-di(pyrazol-1-yl)pyridine-4-carboxylate                                        | CoN <sub>6</sub>                | 30.3 | <i>D</i> = -57.5<br>Δ <sub>ax</sub> = -1850 | <i>E</i> =  15.7 <br>Δ <sub>rh</sub> = 130 |
| [CoL <sub>2</sub> (H <sub>2</sub> O) <sub>2</sub> ] <sup>40</sup><br>HL = quinoline-2-carboxylic acid                                                                               | CoO <sub>4</sub> N <sub>2</sub> | 38.2 | <i>D</i> = 62.1<br>Δ <sub>ax</sub> = 106    | <i>E</i> =  3.17                           |
| [CoL <sub>2</sub> (CH <sub>3</sub> CH <sub>2</sub> O) <sub>2</sub> ] <sup>40</sup><br>HL = quinoline-2-carboxylic acid                                                              | CoO <sub>4</sub> N <sub>2</sub> | 30.3 | <i>D</i> = 72.08<br>Δ <sub>ax</sub> = 150   | <i>E</i> =  7.37                           |
| [Co(pydca)(dmpy)] <sub>2</sub> <sup>41</sup><br>pydca = pyridine-2,6-dicarboxylate                                                                                                  | CoO <sub>4</sub> N <sub>2</sub> |      | <i>D</i> /hc = 55<br>Δ <sub>ax</sub> = -846 | <i>E</i> /hc = 19                          |

|                                                                                                                                                                                                                        |                                 |      |                     |                  |
|------------------------------------------------------------------------------------------------------------------------------------------------------------------------------------------------------------------------|---------------------------------|------|---------------------|------------------|
| dmpy = 2,6-dimethanolpyridine)                                                                                                                                                                                         |                                 |      |                     |                  |
| [Co(teaH <sub>3</sub> )](piv)] <sup>42</sup><br>teaH <sub>3</sub> = triethanolamine<br>piv = trimethylacetate                                                                                                          | CoO <sub>4</sub> N <sub>2</sub> |      | <i>D</i> /hc = 23.1 |                  |
| [Co(L) <sub>2</sub> ](BF <sub>4</sub> ) <sub>2</sub> ·2MeNO <sub>2</sub> <sup>43</sup><br>L = 2,6-di(pyrazol-1-yl)-4-(bromomethyl)pyridine                                                                             | CoN <sub>6</sub>                | 14.6 |                     |                  |
| [Co(L) <sub>4</sub> (NO <sub>3</sub> ) <sub>2</sub> ] <sup>44</sup><br>L = 3-phenylpyrazole                                                                                                                            | CoN <sub>4</sub> O <sub>2</sub> | 10.3 | <i>D</i> = 71.4     | <i>E</i> =  13   |
| [Co(L) <sub>4</sub> (NO <sub>3</sub> ) <sub>2</sub> ] <sup>44</sup><br>L = 4-methylpyridine                                                                                                                            | CoN <sub>4</sub> O <sub>2</sub> | 5.1  | <i>D</i> = 71.5     | <i>E</i> =  9.8  |
| [Co(imidazole) <sub>6</sub> ](BPh <sub>4</sub> ) <sub>2</sub> <sup>45</sup>                                                                                                                                            | CoN <sub>6</sub>                | 15   |                     |                  |
| [Co(imidazole) <sub>6</sub> ](NO <sub>3</sub> ) <sub>2</sub> <sup>45</sup>                                                                                                                                             | CoN <sub>6</sub>                | 4.4  |                     |                  |
| [Co(2-Himap) <sub>2</sub> ] <sup>46</sup><br>2-Himap = o-[(1H-imidazol-2-yl)methylideneamino]phenol                                                                                                                    | CoN <sub>4</sub> O <sub>2</sub> | 9.7  | <i>D</i> = 36.7     | <i>E</i> = 2.0   |
| [Co(AcPyOx) <sub>3</sub> BC <sub>6</sub> H <sub>5</sub> ] <sub>2</sub> ClO <sub>4</sub> <sup>47</sup><br>AcPyOx = 2-Acetylpyridineoxime                                                                                | CoN <sub>6</sub>                | 70.5 | <i>D</i> = -86      |                  |
| [[Co(L1)(2,2'-bipy)]·0.5DMF] <sub>n</sub> <sup>48</sup><br>H <sub>2</sub> L1 = 2,2'-[benzene-1,4-diylbis(methanediylsulfanediyl)]dibenzoic acid                                                                        | CoO <sub>4</sub> N <sub>2</sub> | 9.7  | <i>D</i> = -56.2    | <i>E</i> =  16.4 |
| [[Co(bimb)(H <sub>2</sub> O) <sub>4</sub> ·(L2)·2DMF] <sub>n</sub> <sup>48</sup><br>H <sub>2</sub> L2 = 2,2'-(1,4-phenylenebis(methylene))bis(sulfanediyl)dinicotinic acid<br>bimb = 1,4-bis(benzoimidazo-1-ly)benzene | CoO <sub>4</sub> N <sub>2</sub> | 6.1  | <i>D</i> = 57.5     | <i>E</i> =  13.0 |
| [Co(HATN)(hfca) <sub>2</sub> ·CH <sub>2</sub> Cl <sub>2</sub> ] <sup>49</sup><br>HATN = 5,6,11,12,17,18-hexaazatrinaphthylene                                                                                          | CoO <sub>4</sub> N <sub>2</sub> | 11.9 | <i>D</i> = -60      |                  |
| [Co <sub>2</sub> (3-fba) <sub>4</sub> (4,4'-bpy) <sub>3</sub> (CH <sub>2</sub> OH) <sub>2</sub> ] <sup>50</sup><br>3-Hfba = 3-fluorobenzoic acid<br>4,4'-bpy = 4,4'-bipyridine                                         | CoO <sub>4</sub> N <sub>2</sub> | 15.8 |                     |                  |

|                                                                                                                                                                                        |                                 |      |                                         |                 |
|----------------------------------------------------------------------------------------------------------------------------------------------------------------------------------------|---------------------------------|------|-----------------------------------------|-----------------|
| [Co(abtp) <sub>2</sub> (N <sub>3</sub> ) <sub>2</sub> ] <sup>51</sup><br>abtp = 4-amino-3,5-bis(pyridin-2-yl)-1,2,4-triazole                                                           | CoN <sub>6</sub>                | 54.7 | <i>D</i> = -24.1                        | <i>E</i> = 7.5  |
| [Co(bim) <sub>4</sub> (tcm) <sub>2</sub> ] <sup>52</sup><br>bim = 1-benzylimidazole<br>tcm <sup>-</sup> = tricyanomethanide ion                                                        | CoN <sub>6</sub>                | 28   | <i>D</i> = 46.1<br>$\Delta_{ax}$ = 667  |                 |
| [Co(bmim) <sub>4</sub> (tcm) <sub>2</sub> ] <sup>52</sup><br>bmim = 1-benzyl-2-methylbenzimidazole<br>tcm <sup>-</sup> = tricyanomethanide ion                                         | CoN <sub>6</sub>                | 20   | <i>D</i> = 80.1<br>$\Delta_{ax}$ = -631 |                 |
| [Co(2,6-dfba) <sub>2</sub> (bpp) <sub>2</sub> (H <sub>2</sub> O) <sub>2</sub> ] <sub>n</sub> <sup>53</sup><br>2,6-Hdfba = 2,6-difluorobenzoic acid<br>bpp = 1,3-bis(4-pyridyl)propane  | CoO <sub>4</sub> N <sub>2</sub> | 31.5 | <i>D</i> = 53.2<br>$\Delta_{ax}$ = 119  | <i>E</i> =  7.7 |
| [Co(2,6-dfba) <sub>2</sub> (bpe) <sub>2</sub> (H <sub>2</sub> O) <sub>2</sub> ] <sub>n</sub> <sup>53</sup><br>2,6-Hdfba = 2,6-difluorobenzoic acid<br>bpe = 1,2-bis(4-pyridyl)ethylene | CoO <sub>4</sub> N <sub>2</sub> | 40.3 | <i>D</i> = 65.7<br>$\Delta_{ax}$ = -502 | <i>E</i> =  4.5 |



**Table S2.** Crystallographic data for complexes **1** and **2**.

|                                                                           | compound <b>1</b>                                                                             | compound <b>2</b>                                                                              |
|---------------------------------------------------------------------------|-----------------------------------------------------------------------------------------------|------------------------------------------------------------------------------------------------|
| Formula                                                                   | C <sub>54</sub> H <sub>54</sub> CoN <sub>4</sub> O <sub>4</sub> P <sub>4</sub> S <sub>2</sub> | C <sub>54</sub> H <sub>54</sub> CoN <sub>4</sub> O <sub>4</sub> P <sub>4</sub> Se <sub>2</sub> |
| <i>F</i> <sub>w</sub>                                                     | 1069.94                                                                                       | 1163.74                                                                                        |
| Space group                                                               | P-1                                                                                           | P-1                                                                                            |
| <i>a</i> (Å)                                                              | 9.2942 (1)                                                                                    | 9.2622(2)                                                                                      |
| <i>b</i> (Å)                                                              | 10.3734 (1)                                                                                   | 10.4256(2)                                                                                     |
| <i>c</i> (Å)                                                              | 13.3197 (2)                                                                                   | 13.4612(3)                                                                                     |
| $\alpha$ (°)                                                              | 89.528 (1)                                                                                    | 89.4230(10)                                                                                    |
| $\beta$ (°)                                                               | 85.318 (1)                                                                                    | 85.6970(10)                                                                                    |
| $\gamma$ (°)                                                              | 84.698 (1)                                                                                    | 85.3890(10)                                                                                    |
| <i>V</i> (Å <sup>3</sup> )                                                | 1274.42 (3)                                                                                   | 1292.00(5)                                                                                     |
| <i>Z</i>                                                                  | 1                                                                                             | 1                                                                                              |
| <i>T</i> (°C)                                                             | -113                                                                                          | -113                                                                                           |
| Radiation                                                                 | Cu <i>K</i> $\alpha$                                                                          | Cu <i>K</i> $\alpha$                                                                           |
| $\rho_{\text{calcd}}$ (g cm <sup>-3</sup> )                               | 1.394                                                                                         | 1.496                                                                                          |
| $\mu$ (mm <sup>-1</sup> )                                                 | 4.995                                                                                         | 5.783                                                                                          |
| Reflections with <i>I</i> > 2 $\sigma$ ( <i>I</i> )                       | 3608                                                                                          | 3920                                                                                           |
| <i>R</i> <sub>1</sub> <sup>a</sup> [ <i>I</i> > 2 $\sigma$ ( <i>I</i> )]  | 0.0442                                                                                        | 0.0317                                                                                         |
| <i>wR</i> <sub>2</sub> <sup>a</sup> [ <i>I</i> > 2 $\sigma$ ( <i>I</i> )] | 0.1119                                                                                        | 0.0734                                                                                         |

<sup>a</sup>  $R_1 = \Sigma(|F_o| - |F_c|) / \Sigma(|F_o|)$  and  $wR_2 = [\Sigma[w(F_o^2 - F_c^2)^2] / \Sigma[w(F_o^2)^2]]^{1/2}$ ,  $w = 1 / [\sigma^2(F_o^2) + (\alpha P)^2 + bP]$  and  $P = [\max(F_o^2, 0) + 2F_c^2] / 3$ .  $\alpha = 0.0571$ ,  $b = 1.2764$  for **1**;  $\alpha = 0.0304$ ,  $b = 2.1175$  for **2**.

Further experimental crystallographic details for **1**:  $2\theta_{\text{max}} = 130^\circ$ ; reflections collected/unique/used, 15108/4038 [ $R_{\text{int}} = 0.0472$ ]/4038; 397 parameters refined;  $(\Delta/\sigma)_{\text{max}} = 0.005$ ;  $(\Delta\rho)_{\text{max}}/(\Delta\rho)_{\text{min}} = 0.513/-0.461$  e/Å<sup>3</sup>;  $R_1/wR_2$  (for all data), 0.0496/0.1190.

Further experimental crystallographic details for **2**:  $2\theta_{\text{max}} = 130^\circ$ ; reflections collected/unique/used, 26137/ 4124 [ $R_{\text{int}} = 0.0310$ ]/4124; 417 parameters refined;  $(\Delta/\sigma)_{\text{max}} = 0.006$ ;  $(\Delta\rho)_{\text{max}}/(\Delta\rho)_{\text{min}} = 0.589/-0.454$  e/Å<sup>3</sup>;  $R_1/wR_2$  (for all data), 0.0335/0.0751.

## References

1. A. M. Z. Slawin, M. B. Smith and J. D. Woollins, *J. Chem. Soc., Dalton Trans.*, 1996, 3659-3665.
2. C. Silvestru and J. E. Drake, *Coord. Chem. Rev.*, 2001, **223**, 117-216.
3. D. Maganas, S. S. Staniland, A. Grigoropoulos, F. White, S. Parsons, N. Robertson, P. Kyritsis and G. Pneumatikakis, *Dalton Trans.*, 2006, 2301-2315.
4. E. Ferentinos, D. Maganas, C. P. Raptopoulou, A. Terzis, V. Psycharis, N. Robertson and P. Kyritsis, *Dalton Trans.*, 2011, **40**, 169-180.
5. J. Vallejo, I. Castro, R. Ruiz-Garcia, J. Cano, M. Julve, F. Lloret, G. De Munno, W. Wernsdorfer and E. Pardo, *J. Am. Chem. Soc.*, 2012, **134**, 15704-15707.
6. Y.-Y. Zhu, C. Cui, Y.-Q. Zhang, J.-H. Jia, X. Guo, C. Gao, K. Qian, S.-D. Jiang, B.-W. Wang, Z.-M. Wang and S. Gao, *Chem. Sci.*, 2013, **4**, 1802-1806.
7. E. Colacio, J. Ruiz, E. Ruiz, E. Cremades, J. Krzystek, S. Carretta, J. Cano, T. Guidi, W. Wernsdorfer and E. K. Brechin, *Angew. Chem. Int. Ed.*, 2013, **52**, 9130-9134.
8. V. Chandrasekhar, A. Dey, A. J. Mota and E. Colacio, *Inorg. Chem.*, 2013, **52**, 4554-4561.
9. R. Herchel, L. Váhovská, I. Potočňák and Z. Trávníček, *Inorg. Chem.*, 2014, **53**, 5896-5898.
10. S. Gomez-Coca, A. Urtizberea, E. Cremades, P. J. Alonso, A. Camon, E. Ruiz and F. Luis, *Nat. Commun.*, 2014, **5**, 8.
11. R. Sato, K. Suzuki, T. Minato, M. Shinoe, K. Yamaguchi and N. Mizuno, *Chem. Commun.*, 2015.
12. J. Palion-Gazda, T. Klemens, B. Machura, J. Vallejo, F. Lloret and M. Julve, *Dalton Trans.*, 2015, **44**, 2989-2992.
13. C. Plenck, J. Krause and E. Rentschler, *Eur. J. Inorg. Chem.*, 2015, **2015**, 370-374.
14. Y.-Y. Zhu, M.-S. Zhu, T.-T. Yin, Y.-S. Meng, Z.-Q. Wu, Y.-Q. Zhang and S. Gao, *Inorg. Chem.*, 2015, **54**, 3716-3718.
15. X. Liu, L. Sun, H. Zhou, P. Cen, X. Jin, G. Xie, S. Chen and Q. Hu, *Inorg. Chem.*, 2015, **54**, 8884-8886.
16. Y.-Y. Zhu, T.-T. Yin, C.-W. Liu, C. Gao, Z.-Q. Wu, Y.-Q. Zhang, B.-W. Wang and S. Gao, *Supramol. Chem.*, 2015, **27**, 401-406.
17. R. Díaz-Torres, M. Menelaou, O. Roubeau, A. Sorrenti, G. Brandariz-de-Pedro, E. C. Sañudo, S. J. Teat, J. Fraxedas, E. Ruiz and N. Aliaga-Alcalde, *Chem. Sci.*, 2016, **7**, 2793-2803.
18. J. Walsh, G. Bowling, A.-M. Ariciu, N. Jailani, N. Chilton, P. Waddell, D. Collison, F. Tuna and L. Higham, *Magnetochemistry*, 2016, **2**, 23.
19. A. Świtlicka-Olszewska, J. Palion-Gazda, T. Klemens, B. Machura, J. Vallejo, J. Cano, F. Lloret and M. Julve, *Dalton Trans.*, 2016, **45**, 10181-10193.
20. R. Ishikawa, Y. Horii, R. Nakanishi, S. Ueno, B. K. Breedlove, M. Yamashita and S. Kawata, *Eur. J. Inorg. Chem.*, 2016, **2016**, 3233-3239.
21. C. Villa-Pérez, I. Oyarzabal, G. A. Echeverría, G. C. Valencia-Urbe, J. M. Seco and D. B. Soria, *Eur. J. Inorg. Chem.*, 2016, **2016**, 4835-4841.
22. S. Roy, I. Oyarzabal, J. Vallejo, J. Cano, E. Colacio, A. Bauza, A. Frontera, A. M. Kirillov, M. G. B. Drew and S. Das, *Inorg. Chem.*, 2016, **55**, 8502-8513.

23. A. V. Palii, D. V. Korchagin, E. A. Yureva, A. V. Akimov, E. Y. Misochko, G. V. Shilov, A. D. Talantsev, R. B. Morgunov, S. M. Aldoshin and B. S. Tsukerblat, *Inorg. Chem.*, 2016, **55**, 9696-9706.
24. L. Sun, S. Zhang, S. P. Chen, B. Yin, Y. C. Sun, Z. X. Wang, Z. W. Ouyang, J. L. Ren, W. Y. Wang, Q. Wei, G. Xie and S. L. Gao, *J. Mater. Chem. C*, 2016, **4**, 7798-7808.
25. J. Li, Y. Han, F. Cao, R. M. Wei, Y. Q. Zhang and Y. Song, *Dalton Trans.*, 2016, **45**, 9279-9284.
26. E. A. Buvaylo, V. N. Kokozay, O. Y. Vassilyeva, B. W. Skelton, A. Ozarowski, J. Titiš, B. Vranovičová and R. Boča, *Inorg. Chem.*, 2017, **56**, 6999-7009.
27. F. Varga, C. Rajnák, J. Titiš, J. Moncol' and R. Boča, *Dalton Trans.*, 2017, **46**, 4148-4151.
28. C. Rajnak, F. Varga, J. Titis, J. Moncol and R. Boca, *Inorg. Chem.*, 2018, **57**, 4352-4358.
29. D. V. Korchagin, A. V. Palii, E. A. Yureva, A. V. Akimov, E. Y. Misochko, G. V. Shilov, A. D. Talantsev, R. B. Morgunov, A. A. Shakin, S. M. Aldoshin and B. S. Tsukerblat, *Dalton Trans.*, 2017, **46**, 7540-7548.
30. D. Valigura, C. Rajnák, J. Moncol, J. Titiš and R. Boča, *Dalton Trans.*, 2017, **46**, 10950-10956.
31. C. Rajnák, J. Titiš, J. Moncol', F. Renz and R. Boča, *Eur. J. Inorg. Chem.*, 2017, **2017**, 1520-1525.
32. Z. Y. Ding, Y. S. Meng, Y. Xiao, Y. Q. Zhang, Y. Y. Zhu and S. Gao, *Inorg. Chem. Front.*, 2017, **4**, 1909-1916.
33. G. Novitchi, S. Jiang, S. Shova, F. Rida, I. Hlavička, M. Orlita, W. Wernsdorfer, R. Hamze, C. Martins, N. Suaud, N. Guihéry, A.-L. Barra and C. Train, *Inorg. Chem.*, 2017, **56**, 14809-14822.
34. I. Potocnak, K. Raczova, E. Cizmar, L. Vahovska, O. Bukrynov, S. Vitushkina and L. Findorakova, *Polyhedron*, 2017, **137**, 112-121.
35. H.-W. Wei, Q.-F. Yang, X.-Y. Lai, X.-Z. Wang, T.-L. Yang, Q. Hou and X.-Y. Liu, *CrystEngComm*, 2018, **20**, 962-968.
36. L. Váhovská, S. Vitushkina, I. Potočňák, Z. Trávníček and R. Herchel, *Dalton Trans.*, 2018, **47**, 1498-1512.
37. V. Garcia-Lopez, F. J. Orts-Mula, M. Palacios-Corella, J. M. Clemente-Juan, M. Clemente-Leon and E. Coronado, *Polyhedron*, 2018, **150**, 54-60.
38. R. F. Higgins, B. N. Livesay, T. J. Ozumerzifon, J. P. Joyce, A. K. Rappe and M. P. Shores, *Polyhedron*, 2018, **143**, 193-200.
39. L. Rigamonti, N. Bridonneau, G. Poneti, L. Tesi, L. Sorace, D. Pinkowicz, J. Jover, E. Ruiz, R. Sessoli and A. Cornia, *Chem. Eur. J.*, 2018, **24**, 8857-8868.
40. Z.-B. Hu, Z.-Y. Jing, M.-M. Li, L. Yin, Y.-D. Gao, F. Yu, T.-P. Hu, Z. Wang and Y. Song, *Inorg. Chem.*, 2018, **57**, 10761-10767.
41. R. Boča, C. Rajnák, J. Moncol, J. Titiš and D. Valigura, *Inorg. Chem.*, 2018, **57**, 14314-14321.
42. C. Sarto, M. Rouzières, J.-L. Liu, H. Bamberger, J. van Slageren, R. Clérac and P. Alborés, *Dalton Trans.*, 2018.
43. H. Douib, L. Cornet, J. F. Gonzalez, E. Trzop, V. Dorcet, A. Gouasmia, L. Ouahab, O. Cador and F. Pointillart, *Eur. J. Inorg. Chem.*, 2018, **2018**, 4452-4457.
44. J. J. Zhou, J. B. Song, A. H. Yuan, Z. X. Wang, L. Chen and Z. W. Ouyang, *Inorg. Chim. Acta*, 2018, **479**, 113-119.

45. L. Chen, J. J. Zhou, H. H. Cui, A. H. Yuan, Z. X. Wang, Y. Q. Zhang, Z. W. Ouyang and Y. Song, *Dalton Trans.*, 2018, **47**, 2506-2510.
46. D. Sertphon, K. S. Murray, W. Phonsri, J. Jover, E. Ruiz, S. G. Telfer, A. Alkas, P. Harding and D. J. Harding, *Dalton Trans.*, 2018, **47**, 859-867.
47. A. A. Pavlov, S. A. Savkina, A. S. Belov, Y. V. Nelyubina, N. N. Efimov, Y. Z. Voloshin and V. V. Novikov, *Inorg. Chem.*, 2017, **56**, 6943-6951.
48. Z. Chen, L. Yin, X. Mi, S. Wang, F. Cao, Z. Wang, Y. Li, J. Lu and J. Dou, *Inorg. Chem. Front.*, 2018, **5**, 2314-2320.
49. M. A. Lemes, F. Magnan, B. Gabidullin and J. Brusso, *Dalton Trans.*, 2018, **47**, 4678-4684.
50. P. Cen, W. Yuan, M. Tan, B. Chen, W. Song, Z. Wang and X. Liu, *Inorg. Chem. Commun.*, 2018.
51. L. Váhovská, O. Bukrynov, I. Potočňák, E. Čižmár, A. Kliuikov, S. Vitushkina, M. Dušek and R. Herchel, *Eur. J. Inorg. Chem.*, DOI: 10.1002/ejic.201801225
52. A. Šwitlicka, B. Machura, J. Palion-Gazda, M. Julve, F. Lloret and J. Cano, *Dalton Trans.*, 2019, **48**, 1404-1417.
53. Y. Wu, D. Tian, J. Ferrando-Soria, J. Cano, L. Yin, Z. Ouyang, Z. Wang, S. Luo, X. Liu and E. Pardo, *Inorg. Chem. Front.*, 2019, **6**, 848-856.
